# Supplementary material for: Genome-wide analysis of Milk vetch dwarf virus and related alphasatellites from garlic and aphid isolates from Shandong Province, China
Source: Research Square preprint supplement (doi:10.21203/rs.3.rs-1420975/v1), 2022-03-08
Supplement: Supplementary file 1 [file 10284ce57d47d566909fc6a9.docx]

| Suppl. Table S2 Accession numbers of the MDV sequences used for analysis | | |
| --- | --- | --- |
| Sequence | Isolate | Genbank accession no. |
| MDV_DNA-C | gal | OK274038 |
| MDV_DNA-M | gal | OK274040 |
| MDV_DNA-N | gal | OK274042 |
| MDV_DNA-R | gal | OK274036 |
| MDV_DNA-S | gal | OK274044 |
| MDV_DNA-U1 | gal | OK274048 |
| MDV_DNA-U2 | gal | OK274050 |
| MDV_DNA-U4 | gal | OK274046 |
| MDV_alphasatellite_C1 | gal | OL962720 |
| MDV_alphasatellite_C2 | gal | OL962718 |
| MDV_alphasatellite_C3 | gal | OL962716 |
| MDV_alphasatellite_C10 | gal | OL962714 |
| MDV_DNA-C | aal | OK274039 |
| MDV_DNA-M | aal | OK274041 |
| MDV_DNA-N | aal | OK274043 |
| MDV_DNA-R | aal | OK274037 |
| MDV_DNA-S | aal | OK274045 |
| MDV_DNA-U1 | aal | OK274049 |
| MDV_DNA-U2 | aal | OK274051 |
| MDV_DNA-U4 | aal | OK274047 |
| MDV_alphasatellite_C1 | aal | OL962721 |
| MDV_alphasatellite_C2 | aal | OL962719 |
| MDV_alphasatellite_C3 | aal | OL962717 |
| MDV_alphasatellite_C10 | aal | OL962715 |
